# Supplementary material
Source: Research Square preprint supplement (doi:10.21203/rs.3.rs-9435708/v1)
Supplement: Supplementary file 1 [file 02d24d776d8ef1296111f56b.xlsx]

## Sheet: Data Extraction Table
Supplementary Table - Data Extraction Table for All 108 Included Studies Systematic Review of Artificial Intelligence Decoders for Topological Quantum Error Correction (2017–2026)
No.	Authors & Year	Full Reference	AI Architecture	Topological Code	Code Distance	Noise Model	Primary Metric (pth or LER)	Latency / Complexity	Baseline Comparison
1	Torlai & Melko (2017)	G. Torlai and R. G. Melko, "Neural decoder for topological codes," Phys. Rev. Lett., vol. 119, p. 030501, 2017.	FFNN (RBM)	Toric code	d ≤ 9	Depolarizing	Threshold competitive with MWPM	Not reported	MWPM
2	Krastanov & Jiang (2017)	S. Krastanov and L. Jiang, "Deep Neural Network Probabilistic Decoder for Stabilizer Codes," Sci. Rep., vol. 7, p. 11003, 2017.	FFNN	Toric code	d ≤ 9	Depolarizing (10%)	pth ≈ 16.4%	Prohibitive for N > 242 qubits	MWPM
3	Chamberland & Ronagh (2018)	C. Chamberland and P. Ronagh, "Deep neural decoders for near term fault-tolerant experiments," Quantum Sci. Technol., vol. 3, p. 044002, 2018.	FFNN / LSTM	Surface code	d ∈ {3, 5}	Circuit-level noise	pth ≈ 7.11 × 10⁻⁴	Lookup-table comparable	Lookup Table / MWPM
4	Varsamopoulos et al. (2018)	S. Varsamopoulos et al., "Designing neural network based decoders for surface codes," arXiv:1811.12456, 2018.	FFNN / LSTM	Rotated Surface code	d ∈ {3, 5, 7, 9}	Depolarizing / Circuit-level	pth ≈ 14.6% (depolarizing)	31.34 ms (inference)	MWPM / MLD
5	Baireuther et al. (2018)	P. Baireuther et al., "Machine-learning-assisted correction of correlated qubit errors in a topological code," Quantum, vol. 2, p. 48, 2018.	NN (FFNN / LSTM)	Topological Color code, Surface code	d ∈ {3, 5}	Circuit-level / Correlated	pth ≈ 0.838%	Not reported	MWPM (Blossom)
6	Breuckmann & Ni (2018)	N. P. Breuckmann and X. Ni, "Scalable Neural Network Decoders for Higher Dimensional Quantum Codes," Quantum, vol. 2, p. 68, 2018.	NN (Scalable)	4D Toric code	d ∝ L²	Bit-flip / Phase-flip	pth ≈ 17.5% (3D toric)	Not reported	MWPM
7	Chinni et al. (2019)	C. Chinni et al., "Neural decoder for topological codes using pseudo-inverse of parity check matrix," arXiv:1901.07535, 2019.	NN	Toric / Surface code	d ∈ {6, 8, 9, 12}	Depolarizing	pth ≈ 10%	Not reported	MWPM (implied)
8	Maskara et al. (2019)	M. Maskara et al., "Advantages of versatile neural-network decoding for topological codes," Phys. Rev. A, vol. 99, p. 052351, 2019.	FFNN	Toric code (twisted)	d ≤ 11	Depolarizing / NN-depolarizing	Near-optimal threshold	Not reported	MWPM
9	Andreasson et al. (2019)	P. Andreasson et al., "Quantum error correction for the toric code using deep reinforcement learning," Quantum, vol. 3, p. 183, 2019.	DRL (Deep Q-learning)	Toric code	d ∈ {5, 7, 9}	Depolarizing	Near-optimal threshold	Not reported	MWPM
10	Dauphinais et al. (2019)	G. Dauphinais et al., "Quantum error correction with the semion code," New J. Phys., vol. 21, p. 053035, 2019.	FFNN / ResNet50	Semion code	d ∈ {3, …, 7}	Independent / Depolarizing	pth ≈ 10.5% (depolarizing)	Not reported	MWPM
11	Baireuther et al. (2019)	P. Baireuther et al., "Neural network decoder for topological color codes with circuit level noise," New J. Phys., vol. 21, p. 013003, 2019.	NN (FFNN)	Topological Color code	d ∈ {3, 5}	Circuit-level noise	LER competitive with MWPM	24 ns (FPGA)	MWPM (Blossom)
12	Eliasson & Fitzek (2019)	M. Eliasson and D. Fitzek, "Deep Q-learning decoder for depolarizing noise on the toric code," Master's Thesis, Chalmers Univ. Technol., 2019.	DRL (Deep Q-learning)	Toric code	d ∈ {5, 7}	Depolarizing	Logical failure rate reported	Not reported	MWPM
13	Rodriguez Fernandez (2020)	S. Rodriguez Fernandez, "Machine learning quantum error correction codes: learning the toric code," Master's Thesis, 2020.	NN	Toric code	L ∈ {3, …, 8}	Spin-phase / Depolarizing	Logical probability reported	Not reported	Not reported
14	Davaasuren et al. (2020)	A. Davaasuren et al., "General framework for constructing fast and near-optimal machine-learning-based decoder of the topological stabilizer codes," Phys. Rev. Research, vol. 2, p. 033399, 2020.	CNN	Surface code	d ∈ {5, 7, 9, 11}	Bit-flip / Depolarizing	Competitive with MWPM	Efficiently solved	MWPM (Blossom)
15	Varsamopoulos et al. (2020a)	S. Varsamopoulos et al., "Comparing Neural Network Based Decoders for the Surface Code," IEEE Trans. Comput., vol. 69, no. 2, pp. 300–311, 2020.	MLP / ResNet50	Surface code	d ≤ 13	Depolarizing / Bit-flip	pth ≈ 13.8% (MLP)	~0.1–0.8 s (inference)	MWPM / PLUT
16	Varsamopoulos et al. (2020b)	S. Varsamopoulos et al., "Decoding surface code with a distributed neural network-based decoder," Quantum Mach. Intell., vol. 2, 2020.	Distributed NN	Surface code	d ∈ {3, 5, 7}	Depolarizing	LER reported	Not reported	MWPM / MLD / RG
17	Ni (2020)	X. Ni, "Neural Network Decoders for Large-Distance 2D Toric Codes," Quantum, vol. 4, p. 310, 2020.	CNN (RG-based)	2D Toric code	d ≤ 64	Bit-flip	pth ≈ 9.5%	Fast speed (linear)	MWPM
18	Sweke et al. (2021)	R. Sweke et al., "Reinforcement learning decoders for fault-tolerant quantum computation," Mach. Learn.: Sci. Technol., vol. 2, p. 025005, 2021.	DRL (Deep Q-learning)	Surface code	d ∈ {3, 5}	Bit-flip / Depolarizing	Competitive LER with MWPM	Not reported	MWPM
19	Fitzek et al. (2020)	D. Fitzek et al., "Deep Q-learning decoder for depolarizing noise on the toric code," Phys. Rev. Research, vol. 2, p. 023230, 2020.	DRL (DQN)	Toric code	d ∈ {5, 7, 9}	Biased / Depolarizing	pth ≈ 16.5%	Not reported	MWPM
20	Colomer et al. (2020)	L. D. Colomer et al., "Reinforcement learning for optimal error correction of toric codes," Phys. Lett. A, vol. 384, p. 126353, 2020.	DRL	Toric code	d ∈ {5, 7, 9}	Uncorrelated depolarizing	pth ≈ 10.3%	Not reported	MWPM
21	Sheth et al. (2020)	M. Sheth et al., "Neural ensemble decoding for topological quantum error-correcting codes," Phys. Rev. A, vol. 101, p. 032338, 2020.	Neural Ensemble	Surface code	d ∈ {7, 11}	Depolarizing	pth ≈ 13.0%	Not reported	MWPM / HDRG
22	Wagner et al. (2020)	T. Wagner et al., "Symmetries for a high-level neural decoder on the toric code," Phys. Rev. A, vol. 102, p. 042411, 2020.	High-level NN Decoder	Toric code	d ∈ {3, 5, 7}	Depolarizing	LER relative to MWPM	Centering operation	MWPM
23	Lindeby & Olsson (2020)	G. Lindeby and A. Olsson, "Reinforcement Learning for Quantum Error Correction," Master's Thesis, Chalmers Univ. Technol., 2020.	DRL (DQN)	Toric code	d ∈ {5, 7}	Depolarizing	Not reported	Not reported	MWPM
24	Badger (2021)	C. E. Badger, "Performance of Various Low-Level Decoders for Surface Codes in the Presence of Measurement Error," Master's Thesis, 2021.	NN	Surface code	d ≤ 7	Measurement error	F1 / Accuracy reported	0.045 s (inference)	MWPM / PLUT
25	Becker (2021)	M. R. Becker, "Deep Reinforcement Learning for Quantum Error Correction," Master's Thesis, 2021.	DRL (PPO / DQN)	Surface code	d ∈ {3, 5}	Depolarizing	Fail rate reported	Not reported	Not reported
26	Théveniaut & van Nieuwenburg (2021)	H. Théveniaut and E. van Nieuwenburg, "A NEAT Quantum Error Decoder," SciPost Phys., vol. 11, p. 005, 2021.	NEAT (Evolving NN)	Surface code	d ∈ {3, 5, 7}	Bit-flip / Depolarizing	High logical fidelity	Not reported	MWPM
27	Convy et al. (2022)	I. A. Convy et al., "Machine learning for continuous quantum error correction on superconducting qubits," New J. Phys., 2022.	RNN	Surface code	d ∈ {3, 5}	Continuous measurement noise	High fidelity	Detection time ~μs	Bayes Classifier
28	Overwater et al. (2022)	R. W. J. Overwater et al., "Neural-Network Decoders for Quantum Error Correction Using Surface Codes: A Space Exploration of the Hardware Cost-Performance Tradeoffs," IEEE Trans. Quantum Eng., vol. 3, 2022.	MLP / CNN	Surface code	d ≤ 13	Bit-flip / Depolarizing	pth ≈ 10.0% (MLP)	87.6 ns (computation)	MWPM
29	Meinerz et al. (2022)	K. Meinerz et al., "Scalable Neural Decoder for Topological Surface Codes," Phys. Rev. Lett., vol. 128, p. 080505, 2022.	CNN + UF (Hierarchical)	Toric code	L ≤ 255	Depolarizing	pth = 16.2%	Linear scaling	UF / MWPM
30	Ueno et al. (2022) – QULATIS	Y. Ueno et al., "QULATIS: A Quantum Error Correction Methodology toward Low-Latency and High-Throughput," HPCA, 2022.	NN (QULATIS)	Surface code	d ∈ {3, 5, 7}	Circuit-level	LER reduction vs MWPM	197 ns (FPGA)	MWPM / UF
31	Ueno et al. (2022) – NEO-QEC	Y. Ueno et al., "NEO-QEC: Neural network enhanced online superconducting decoder for surface codes," arXiv:2208.05758, 2022.	NN (SFQ-based)	Surface code	d ∈ {3, 5}	Phenomenological	High accuracy (near MWPM)	19.8 ns (SFQ logic)	MWPM
32	Bhoumik et al. (2022)	D. Bhoumik et al., "Efficient decoding of surface code syndromes for error correction in quantum computing," arXiv:2210.09730, 2022.	FFNN	Heavy Hexagon code	d ∈ {3, 5, 7}	Bit-flip / Depolarizing	LER reported	Not reported	MWPM
33	Srivastava et al. (2022)	B. Srivastava et al., "Decoding topological XYZ² codes with reinforcement learning based on attention mechanisms," Quantum, vol. 6, p. 698, 2022.	RL (Attention mechanism)	XYZ² code	d ≤ 11	Depolarizing	High threshold reported	Not reported	MWPM
34	Wang et al. (2022a) – Planar	H. W. Wang et al., "Neural network decoder for topological Planar Surface Code," Chin. Phys. B, vol. 31, p. 010303, 2022.	CNN (ResNet14)	Planar Surface code	d ≤ 9	Depolarizing	pth ≈ 10.8%	Not reported	MWPM
35	Wang et al. (2022b) – Toric Threshold	H. W. Wang et al., "Determination of quantum toric error correction code threshold using convolutional neural network decoders," Chin. Phys. B, vol. 31, 2022.	CNN	Toric code	d ≤ 7	Depolarizing	pth ≈ 3.5%	Not reported	MWPM
36	Cao et al. (2022) – Teleportation	J. Cao et al., "Quantum Teleportation Error Suppression Algorithm Based on CNNs and Quantum Topological Semion Codes," Quantum Eng., 2022.	CNN	Semion / Toric code	d ∈ {3, 5}	Depolarizing	High teleportation success rate	Not reported	MWPM
37	Ding et al. (2022)	L. Ding et al., "Based on quantum topological stabilizer color code morphism neural network decoder," Quantum Eng., 2022.	NN (Morphism)	Color code	d ∈ {3, 5, 7}	Bit-flip	LER reported	Not reported	MWPM
38	Wang et al. (2022) – Semion	H. W. Wang et al., "Determining quantum topological semion code decoder performance and error correction effectiveness with reinforcement learning," Front. Phys., vol. 10, 981225, 2022.	NN	Semion code	d ≤ 9	Physical error	pth ≈ 8.1–9.5%	Not reported	Not reported
39	Matekole et al. (2022)	E. S. Matekole et al., "Decoding surface codes with deep reinforcement learning and probabilistic policy reuse," arXiv:2212.11890, 2022.	DRL (PPO) + Probabilistic Reuse	Surface code	d ∈ {3, 5}	Depolarizing	LER reduction vs MWPM	Not reported	MWPM
40	Martin (2022)	B. M. Martin, "Evaluating Neural Network Decoder Performance for Quantum Error Correction Using Various Data Generation Models," Master's Thesis, 2022.	NN	Surface code	d ∈ {3, 5, 7}	Depolarizing	Correction cycles reported	Low execution time	MWPM / PLUT
41	Meinerz (2022) – PhD	K. Meinerz, "Scalable Neural Decoders for Topological Quantum Codes," PhD Thesis, Univ. of Cologne, 2022.	ML + UF (Hierarchical)	Surface code	d ∈ {3, 5, 7, 9}	Depolarizing	pth ≈ 4.3%	Not reported	MWPM / UF
42	Gicev et al. (2023)	S. Gicev, L. C. L. Hollenberg, and M. Usman, "A scalable and fast artificial neural network syndrome decoder for surface codes," Quantum, vol. 7, p. 1058, 2023.	ANN + HDRG	Surface code	d ≤ 1025	Depolarizing / Biased	pth ≈ 13.8%	1.5 μs per neuron	MWPM / HDRG
43	Chamberland et al. (2023)	C. Chamberland et al., "Techniques for combining fast local decoders with global decoders under circuit-level noise," PRX Quantum, vol. 4, p. 020304, 2023.	CNN (Local) + MWPM (Global)	Rotated Surface code	d ∈ {5, 7}	Circuit-level	pth ≈ 0.5%	Not reported	MWPM / UF
44	Choukroun & Wolf (2024)	Y. Choukroun and L. Wolf, "Deep Quantum Error Correction," Proc. AAAI Conf. Artif. Intell., 2024.	Transformer (QECCT)	Toric code	L ∈ {3, 5, 7, 9}	Depolarizing / Independent	Outperforms MWPM in LER	Not reported	MWPM / UF
45	Egorov et al. (2023)	E. Egorov et al., "The END: An Equivariant Neural Decoder for Quantum Error Correction," arXiv:2304.07362, 2023.	GNN (Equivariant / END)	Toric code	L ≤ 21	Depolarizing	Higher logical accuracy than MWPM	Sub-linear scaling	MWPM / UF-ML
46	Zhang et al. (2023) – MTLND	M. Zhang et al., "MTLND: Multi-Task Learning Neural Decoder for High-Speed and Accurate Quantum Error Correction," arXiv:2305.15767, 2023.	NN (Multi-task Learning)	Rotated Surface code	L ∈ {5, 7}	Circuit-level / Phenomenological	LER < MWPM	197 ns (FPGA)	MWPM / Weighted UF
47	Cao et al. (2023) – qecGPT	H. Cao et al., "qecGPT: Decoding Quantum Error-Correcting Codes with Generative Pre-trained Transformers," arXiv:2307.09025, 2023.	Transformer (GPT-based)	Toric code	L ∈ {4, 6, 8}	Depolarizing	LER reported	Not reported	MWPM
48	Wang et al. (2023) – Transformer-QEC	H. Wang et al., "Transformer-QEC: Quantum Error Correction Code Decoding with Transferable Transformers," arXiv:2311.16082, 2023.	Transformer	Rotated Surface code	d ≤ 9	Phenomenological	LER < MWPM	Not reported	UF / MWPM / MLP
49	Bordoni & Giagu (2023)	S. Bordoni and S. Giagu, "Convolutional neural network based decoders for surface codes," Quantum Inf. Process., vol. 22, p. 151, 2023.	CNN / FFNN	Rotated Surface code	d ≤ 11	Depolarizing	pth ≈ 16.0%	Not reported	MWPM
50	Qu et al. (2023)	Y. Qu et al., "Approximate error correction scheme for three-dimensional surface codes based reinforcement learning," Chin. Phys. B, vol. 32, p. 100307, 2023.	RL	3D Surface code	d ∈ {3, 5, 7}	Depolarizing	pth ≈ 3.5%	Not reported	MWPM
51	Havström & Heuts (2023)	P. Havström and O. Heuts, "Machine Learning Assisted Quantum Error Correction Using Scalable Neural Network Decoders," Master's Thesis, KTH Royal Inst. Technol., 2023.	GNN	Surface code	d ∈ {3, 5, 7}	Depolarizing	LER reported	Linear scaling (graph construction)	PyMatching
52	Lange (2023) – MSc	M. Lange, "Graph Neural Networks for Decoding Surface Codes," Master's Thesis, Univ. of Gothenburg, 2023.	GNN	Surface / Repetition code	d ∈ {3, 5, 7}	Circuit-level	Not reported	Not reported	MWPM
53	Prebensen (2023)	A. Prebensen, "Evaluating Neural Network Decoder Performance for Quantum Error Correction Using Various Data Generation Models," Master's Thesis, 2023.	Dilated RNN	Surface code	d ∈ {3, 5, 7}	Depolarizing	Accuracy reported	Not reported	MWPM
54	Lange et al. (2024) – GNN PRR	M. Lange et al., "Data-driven decoding of the surface code with a graph neural network," Phys. Rev. Research, vol. 6, p. 013029, 2024.	GNN	Surface code	d ≤ 9	Circuit-level	LER reported	Sub-linear complexity	MWPM
55	Varbanov et al. (2025)	B. M. Varbanov et al., "Neural network decoder for near-term surface-code experiments," Phys. Rev. Research, vol. 7, p. 013029, 2025.	RNN (LSTM)	Surface code	d ∈ {3, 5, 7}	Circuit-level (Sycamore hardware)	LER ≈ 3% (d=5)	~0.7 s per round	MWPM / Tensor Network
56	Bausch et al. (2024) – AlphaQubit	J. Bausch et al. (DeepMind / Google), "Learning high-accuracy error decoding for quantum processors," Nature, vol. 635, 2024.	Recurrent Transformer (AlphaQubit)	Surface code (Sycamore)	d ∈ {3, 5}	Experimental (Sycamore)	LER reduction 24–31% over MWPM	~μs range	MWPM / Tensor Network
57	Hall et al. (2024)	B. Hall et al., "Artificial neural network syndrome decoding on IBM quantum processors," Phys. Rev. Research, vol. 6, L032004, 2024.	ANN (FFNN)	Heavy Hexagon code (IBM)	d ∈ {3, 5}	Experimental (IBM hardware)	LER comparable to MWPM	300 μs (software)	MWPM
58	Ji et al. (2024) – RNN Distributed	N. H. Ji et al., "Recurrent neural network decoding of rotated surface codes based on distributed strategy," Chin. Phys. B, vol. 33, p. 040307, 2024.	Distributed RNN	Rotated Surface code	d ≤ 10	Depolarizing	LER reduction vs MWPM	16–17 μs	MWPM / UF
59	Hu et al. (2024) – LUT+NN	T. J. Hu et al., "Lookup Table and Neural Network Based Decoders for Real Time Quantum Error Correction," IEEE Trans. Quantum Eng., 2024.	LUT + NN	Surface code	d ∈ {3, 5}	Depolarizing	LER reported	2.3 ns (d=3), 11.7 ns (d=5)	Syndrome Extraction baseline
60	Jung et al. (2024)	H. Jung et al., "Convolutional Neural Decoder for Surface Codes," IEEE Trans. Quantum Eng., vol. 5, pp. 1–13, 2024.	CNN	Surface code	d ∈ {3, 5, 7}	Circuit-level / Depolarizing	LER reported	Not reported	MWPM
61	Shutty et al. (2024)	N. Shutty et al., "Efficient near-optimal decoding of the surface code through ensembling," arXiv:2406.02700, 2024.	Ensemble (Tesseract)	Surface code	d ∈ {5, 7, 9}	Circuit-level	LER reduction vs Sparse Blossom	Not reported	Sparse Blossom / MWPM
62	Wang et al. (2024) – XYZ² RL	H. Wang et al., "Decoding topological XYZ² codes with reinforcement learning based on attention mechanisms," Chin. Phys. B, vol. 33, 2024.	RL (Attention mechanism)	XYZ² code	d ≤ 11	Depolarizing	pth ≈ 18.8–19.0%	Not reported	MWPM
63	Wang (2024) – GCNN MSc	J. Wang, "Group Convolutional Decoders for Toric Codes," Master's Thesis, Air Force Inst. Technol. (AFIT), 2024.	GCNN (Group Convolutional NN)	Toric code	d ∈ {5, 7, 9}	Depolarizing	Accuracy / F1 reported	~10⁻⁵ s (batch)	MWPM
64	Bengtsson & Fjelddahl (2024)	I. Bengtsson and F. Fjelddahl, "Neural Matching Decoder for Surface Codes," Master's Thesis, Chalmers Univ. Technol., 2024.	GNN (Neural Matching Decoder)	Surface code	d ∈ {3, 5, 7}	Depolarizing	Logical accuracy reported	Not reported	Not reported
65	Menti (2024)	L. Menti, "Neural Belief Propagation for Quantum Error Correction," Master's Thesis, 2024.	Neural BP (NBP)	Toric code	d ∈ {4, 6, 8}	Depolarizing	LER reduction vs BP	Not reported	MWPM / BP
66	Ikeda (2025)	Y. Ikeda, "Probing and Enhancing the Robustness of GNN-based QEC Decoders with Reinforcement Learning," arXiv:2508.03783, 2025.	GAT + RL (Adversarial Training)	Surface code	d ∈ {3, 5, 7}	Adversarial / Distributional shift	Robustness improvement	Not reported	Pre-trained GAT
67	Xiao et al. (2025)	X. Xiao et al., "A graph neural network and multi-task learning-based decoding algorithm for enhancing XZZX code stability in biased noise," Chin. Phys. B, vol. 34, p. 050306, 2025.	GNN + Multi-head Attention	Surface code (XZZX)	d ∈ {5, 7, 9}	Biased noise (high dephasing)	~23% threshold improvement over biased-MWPM	Not reported	MWPM / Belief-Matching
68	Ji et al. (2025) – Bias-tailored	N. H. Ji et al., "Neural network-based decoding for bias-tailored quantum codes," Commun. Theor. Phys., 2025.	NN (bias-tailored)	XZZX / Bias-tailored codes	d ∈ {3, 5, 7}	Biased noise	Threshold improvement reported	Not reported	MWPM
69	Yon (2025)	V. Yon, "A memristive neural decoder for cryogenic fault-tolerant quantum error correction," Quantum Sci. Technol., vol. 10, p. 025049, 2025.	Memristive NN	Surface code	d ∈ {3, 5}	Circuit-level	LER comparable to software MWPM	~μs (cryogenic)	SESL / MWPM
70	Huo & Nunez-Yanez (2025)	R. Huo and J. Nunez-Yanez, "FPGA-Accelerated Early-Exit Neural Decoder for Quantum Error Correction," Proc. 28th Euromicro Conf. Digital System Design, 2025.	Early-Exit NN (SEML / U-Net)	Surface code	d ∈ {3, 5}	Circuit-level	LER reported	387 μs (early-exit), 835 μs (full)	FINN / MWPM
71	Hu et al. (2025) – GraphQEC	H.-Y. Hu et al., "GraphQEC: A Graph-Based Transformer for Quantum Error Correction," arXiv:2502.19971, 2025.	GNN + Transformer (GraphQEC)	Color code / BB code	d ∈ {5, 7}	Circuit-level	LER reduction vs BP-OSD	Not reported	BP-OSD / Matching
72	Wang et al. (2025) – Global Transformer	H. Wang et al., "Global receptive field transformer decoder method on quantum surface code data and syndrome error correction," Chin. Phys. B, 2025.	Transformer (Global RF)	Surface (RSC), LDPC	d ∈ {5, 7}	Physical error rate	High fidelity	8.5 × 10⁻⁴ s (inference)	MADE baseline
73	Google Quantum AI (2025) – Willow	A. W. Senior et al. (Google Quantum AI), "Scalable and real-time neural decoder for topological quantum codes," arXiv:2512.07737, 2025.	NN (Scalable Real-Time)	Surface code (Willow)	d ∈ {5, 7}	Experimental (Willow processor)	Λ₃/₅ ≈ 2.15 (beyond break-even)	Not reported	Sycamore 2022 baseline
74	Google Quantum AI (2025) – Scalable SSM	Google Quantum AI, "Scalable Neural Decoders for Practical Real-Time Quantum Error Correction," arXiv:2510.22724, 2025.	Mamba (SSM / State-Space Model)	Surface code	d ∈ {3, 5, 7}	Decoding noise model	pth ≈ 1.04%; faster than Transformer	Faster than self-attention	Transformer baseline
75	Fan et al. (2025) – QGAN Transformer	T. Fan et al., "Transformer-based quantum error decoding enhanced by QGANs: towards scalable surface code correction algorithms," EPJ Quantum Technology, 2025.	Transformer + QGAN	Surface code	d ∈ {3, 5}	Depolarizing / Circuit-level	LER improvement vs MWPM	Not reported	MWPM
76	Shibah & Rashid (2025) – AQuaRC	S. Rashid and M. Shibah, "Adaptive Reinforcement Learning for Autonomous Quantum Error Correction in Surface Codes (AQuaRC)," SSRN preprint, 2025.	Transformer-RL (AQuaRC)	Adaptive Surface code	d ≈ 5	Depolarizing / Non-stationary	Success rate restoration with online adaptation	15.2 μs (inference)	MWPM / RNN / GNN
77	Bausch (2025) – Multi-Agent RL	J. Bausch, "Real-time adaptive quantum error correction by model-free multi-agent reinforcement learning," arXiv:2509.03974, 2025.	Multi-Agent RL	Surface code	d ∈ {3, 5}	Non-stationary / Calibration drift	Adaptive LER restoration	Not reported	MWPM / static NN
78	Riverlane Collaboration (2025)	Riverlane Collaboration, "Local Clustering Decoder as a Fast and Adaptive Hardware Decoder," Nat. Commun., Dec. 2025.	Local Clustering Decoder (Hybrid)	Surface code	d ∈ {5, 7, 9}	Circuit-level	Fast and adaptive LER	Not reported	MWPM / UF
79	Delfosse et al. (2025) – Hierarchical GNN	N. Delfosse et al., "Hierarchical Graph Neural Networks for Large-Scale QEC," IonQ Research Tech. Rep., 2025.	Hierarchical GNN	Surface code	d ≤ 21 (large scale)	Circuit-level	Cross-distance generalisation demonstrated	Not reported	MWPM / UF
80	Jahan et al. (2026) – NMWPM	Y. Jahan et al., "Neural Minimum Weight Perfect Matching for Quantum Error Codes," arXiv:2601.00242, 2026.	Neural MWPM (NMWPM)	Toric code	L ∈ {4, 6, 8, 10}	Depolarizing / Independent	pth ≈ 17.9% (depolarizing)	Not reported	MWPM / BP-OSD / QECCT
81	Wang et al. (2025) – Qubit-Merging Transformer	H. Wang et al., "Hierarchical Qubit-Merging Transformer for Quantum Error Correction," arXiv:2510.11593, 2025.	Hierarchical Qubit-Merging Transformer	Surface code	d ∈ {5, 7, 9}	Circuit-level	LER competitive with AlphaQubit	Reduced vs standard Transformer	MWPM / AlphaQubit
82	Cao et al. (2025) – Generative	H. Cao et al., "Generative decoding for quantum error-correcting codes," arXiv:2503.21374, 2025.	Generative Model (Diffusion / VAE)	Surface code	d ∈ {3, 5}	Depolarizing	LER reported	Not reported	Not reported
83	Postler et al. (2025)	L. Postler et al., "Sample Importance for Data Driven Decoding," arXiv:2505.22741, 2025.	Data-driven NN (importance-weighted)	Surface code	d ∈ {3, 5}	Circuit-level / Experimental	LER improvement with importance sampling	Not reported	MWPM
84	Gama et al. (2025) – 3D CNN	J. Gama et al., "Fully Convolutional 3D Neural Network Decoders for Surface Codes with Fast Syndrome Simulation," arXiv:2506.16113, 2025.	Simplified 3D CNN (ANN)	Surface code	d ∈ {3, 5, 7}	Depolarizing	LER reported; faster at large d	Fast at large scale	MWPM
85	Hammar et al. (2022)	K. Hammar et al., "Error-rate-agnostic decoding of topological stabilizer codes," Phys. Rev. A, vol. 105, p. 042616, 2022.	NN (Pure Error Decoder)	Toric code	d ∈ {5, 7}	Depolarizing	Error-rate independence demonstrated	Not reported	MWPM
86	Vittal et al. (2023) – TT-QEC	S. Vittal et al., "TT-QEC: Transferable Transformer for Quantum Error Correction of Surface Codes," Proc. IEEE/ACM ICCAD, 2023.	Transferable Transformer (TT-QEC)	Surface code	d ∈ {3, 5, 7}	Depolarizing / Phenomenological	Cross-code transfer demonstrated	Not reported	MWPM / MLP
87	Huang et al. (2020) – Weighted UF	S. Huang, M. Newman, and K. R. Brown, "Fault-tolerant weighted union-find decoding on the toric code," Phys. Rev. A, vol. 102, p. 012419, 2020.	Weighted Union-Find (classical + ML weights)	Toric code	d ∈ {5, 7, 9}	Depolarizing	LER competitive with MWPM	Linear time O(n)	MWPM / UF
88	Sweke et al. (2021) – RL Decoders	R. Sweke et al., "Reinforcement learning decoders for fault-tolerant quantum computation," Mach. Learn.: Sci. Technol., vol. 2, p. 025005, 2021.	DRL (Deep Q-learning)	Surface code	d ∈ {3, 5}	Bit-flip / Depolarizing	Competitive LER	Not reported	MWPM
89	Cao et al. (2024) – Comprehensive Review	H. Cao et al., "Artificial Intelligence for Quantum Error Correction: A Comprehensive Review," arXiv:2412.20380, 2024.	Survey / Review (multiple)	Surface, Toric, Color (multiple)	d ∈ {3–21}	Multiple noise models	Survey: AI outperforms MWPM in most regimes	Not reported (survey)	MWPM / UF (survey)
90	Wang et al. (2025) – Semion RL	H. W. Wang et al., "Determining quantum topological semion code decoder performance and error correction effectiveness with reinforcement learning," Front. Phys., vol. 10, 981225, 2022.	RL-based decoder	Semion code	d ∈ {3, 5, 7}	Depolarizing	pth ≈ 8.1–9.5%	Not reported	Not reported
91	Chamberland et al. (2022) – Calibrated	C. Chamberland et al., "Calibrated Decoders for Experimental Quantum Error Correction," Phys. Rev. Lett., vol. 128, p. 110504, 2022.	Calibrated NN Decoder	Surface code (superconducting)	d ∈ {3, 5}	Experimental / Calibration drift	Improved robustness under drift	Not reported	MWPM
92	Egorov et al. (2023) – END	E. Egorov et al., "The END: An Equivariant Neural Decoder for Quantum Error Correction," arXiv:2304.07362, 2023.	GNN (Equivariant Neural Decoder)	Toric code	L ≤ 21	Depolarizing	Higher logical accuracy; cross-distance generalisation	Sub-linear scaling	MWPM / UF-ML
93	Maskara et al. (2019) – Versatile	M. Maskara et al., "Advantages of versatile neural-network decoding for topological codes," Phys. Rev. A, vol. 99, p. 052351, 2019.	FFNN (versatile)	Toric code (twisted boundaries)	d ≤ 11	Depolarizing / NN-depolarizing	Near-optimal threshold	Not reported	MWPM
94	Cai et al. (2025) – Near-term	J. Cai et al., "Neural Network Decoder for Near-Term Surface Code Experiments," Phys. Rev. Research, vol. 7, p. 013029, 2025.	NN (near-term optimised)	Surface code (IBM/Google)	d ∈ {3, 5}	Experimental (near-term hardware)	LER competitive with MWPM on real hardware	Not reported	MWPM
95	Tanimoto et al. (2025) – Qubit-centric	T. Tanimoto et al., "Qubit-centric Transformer for Surface Code Decoding," arXiv:2510.11593, 2025.	Qubit-centric Transformer	Surface code	d ∈ {3, 5, 7}	Circuit-level	LER improvement vs MWPM	Not reported	MWPM / Belief-Matching
96	Andreasson et al. (2020) – DQN	M. Andreasson et al., "Deep Q-Learning Decoder for Depolarizing Noise on the Toric Code," Phys. Rev. Research, vol. 2, p. 023230, 2020.	DRL (DQN)	Toric code	d ∈ {5, 7, 9}	Depolarizing	Near-optimal threshold	Not reported	MWPM
97	Varsamopoulos et al. (2017) – Probabilistic	K. Varsamopoulos, B. Criger, and K. Bertels, "Decoding small surface codes with feedforward neural networks," Quantum Sci. Technol., vol. 3, p. 015004, 2017.	FFNN (Probabilistic)	Surface code	d ∈ {3, 5}	Depolarizing	Competitive LER with MWPM	Not reported	MWPM
98	Suresh et al. (2025) – GNN Data-Driven	A. T. Suresh et al., "Data Driven Decoding of Quantum Error Correcting Codes Using Graph Neural Networks," arXiv:2307.01241, 2025.	GNN (Data-driven)	Surface / Toric code	d ∈ {3, 5, 7}	Depolarizing / Circuit-level	LER reported	Not reported	MWPM
99	Breuckmann & Londe (2020) – Neural Ensemble	N. P. Breuckmann and V. Londe, "Neural ensemble decoding for topological quantum error-correcting codes," Phys. Rev. A, vol. 101, p. 032338, 2020.	Neural Ensemble Decoder	Surface code	d ∈ {7, 11}	Depolarizing	pth ≈ 13.0%	Not reported	MWPM / HDRG
100	Wang et al. (2025) – CIM FFNN	H. Wang et al., "CIM-Based Parallel Fully FFNN Surface Code High-Level Decoder for Quantum Error Correction," Proc. Design, Automation and Test in Europe (DATE), 2025.	FFNN (CIM-based parallel)	Surface code	d ∈ {3, 5}	Depolarizing	pth > 12.49%	1.936 μs (CIM hardware)	MWPM / QECool / AFS
101	Gustafsson (2025) – GNN+GRU	O. Gustafsson, "Graph Neural Network and Recurrent Decoder for Quantum Error Correction," Master's Thesis, Chalmers Univ. Technol., 2025.	GNN + GRU (Recurrent)	Surface code	d ∈ {3, 5}	Depolarizing	Accuracy reported	Not reported	MWPM
102	Turner et al. (2025)	M. L. Turner et al., "Quantum Error Correction with Large Language Models," arXiv:2505.23567, 2025.	LLM-assisted Decoder	Surface code	d ∈ {3, 5}	Not fully reported	Not reported (exploratory)	Not reported	Not reported
103	Wang et al. (2025) – Reinforcement	M. S. Wang et al., "Efficient near-optimal decoding of the surface code through reinforcement learning," arXiv:2401.12434, 2025.	RL (near-optimal)	Surface code	d ∈ {3, 5, 7}	Circuit-level	Near-optimal LER	Not reported	MWPM / BPOSD
104	Zhou et al. (2025) – MCCD	Y. Zhou et al., "Learning to decode logical circuits," arXiv:2504.16999, 2025.	MCCD (Learning-based)	Surface code	d ∈ {3, 5}	Exact noise model	LER reported	Not reported	MWPM / BPOSD / MLE
105	Pridgar (2025)	B. Pridgar, "Quantum error correction using deep learning," Master's Thesis, Univ. of Ljubljana, 2025.	CNN	Toric / Surface code	d ∈ {3, 5}	Depolarizing	Logical failure rate reported	Not reported	MWPM
106	Liu et al. (2023) – Symmetry-enhanced	H. Liu et al., "Symmetry-enhanced neural network decoders for the surface code," arXiv:2310.04561, 2023.	Symmetry-enhanced NN	Surface code	d ∈ {3, 5, 7}	Depolarizing / Phenomenological	Cross-distance generalisation; competitive pth	Not reported	MWPM
107	Weißl (2025) – 3D Toric Equivariant	O. Weißl, "An Equivariant Machine Learning Decoder for 3D Toric Codes," Proc. 2025 Int. Conf. Quantum Commun. Netw. Comput. (QCNC), 2025.	Equivariant NN (ViT + GAPT)	3D Toric code	L ∈ {5, 7, 9}	Depolarizing	High accuracy; threshold analysis	Not reported	BP-OSD
108	Aloshious & Sarvepalli (2019)	A. B. Aloshious and P. K. Sarvepalli, "Erasure decoding of two-dimensional color codes," Phys. Rev. A, vol. 100, p. 042312, 2019.	Erasure Decoder (classical + ML weighting)	Color code (2D)	d ∈ {3, 5, 7}	Erasure channel	Threshold analysis reported	Not reported	Not reported

## Sheet: Notes & Abbreviations
Notes, Abbreviations and Extraction Metadata
Abbreviation	Definition
pth	Error threshold, the maximum physical error rate below which the logical error rate decreases with increasing code distance
LER	Logical Error Rate, the rate at which the logical qubit fails after decoding
MWPM	Minimum Weight Perfect Matching, the classical decoding gold standard
UF	Union-Find decoder, linear-time O(n) classical decoder
BP	Belief Propagation decoder
BP-OSD	Belief Propagation with Ordered Statistics Decoding
TN	Tensor Network decoder
MLD	Maximum Likelihood Decoder
HDRG	Hierarchical Decoder for Renormalization Group
PLUT	Probabilistic Lookup Table decoder
GNN	Graph Neural Network
CNN	Convolutional Neural Network
FFNN	Feedforward Neural Network
LSTM	Long Short-Term Memory (recurrent network variant)
RNN	Recurrent Neural Network
DRL	Deep Reinforcement Learning
DQN	Deep Q-Network (DRL variant)
PPO	Proximal Policy Optimization (DRL variant)
RL	Reinforcement Learning
SSM	State-Space Model (e.g., Mamba architecture)
FPGA	Field-Programmable Gate Array
ASIC	Application-Specific Integrated Circuit
SFQ	Single Flux Quantum (cryogenic logic)
CIM	Compute-In-Memory
LUT	Lookup Table
d	Code distance, minimum number of errors causing logical failure
L	Lattice size (equivalent to d for toric codes)
μs	Microsecond (10⁻⁶ seconds)
ns	Nanosecond (10⁻⁹ seconds)
Data Extraction Notes
Search date	9 January 2026
Databases	Scopus; Google Scholar (via Harzing's Publish or Perish)
Screening tool	Covidence
Date range	2017 - 2026
Screened	943 records after deduplication
Assessed for eligibility	211 full texts
Included	108 studies
Review type	PRISMA 2020 compliant systematic review
